# Supplementary material for: Bridging the Undergraduate Curriculum Using an Integrated Course-Embedded Undergraduate Research Experience (ICURE)
Source: Atypon-hosted journal article supplement (doi:10.1187/cbe.14-09-0151), 2015-03-02
Supplement: combinedsupmats.pdf [file combinedsupmats.pdf]

# Supplemental Material

*CBE—Life Sciences Education*

Russell *et al.*

Appendix 1. Content knowledge and skills assessment questions forPOB (BIOL 1108K, Principles of Biology II). Content knowledge and skills were assessed with pre-exposure (beginning of semester) and post-exposure (end of semester) tests.\* indicates correct answer.

| Content area    | Question                                                                                                                                                                                                                                                                                                                                              |
|-----------------|-------------------------------------------------------------------------------------------------------------------------------------------------------------------------------------------------------------------------------------------------------------------------------------------------------------------------------------------------------|
| <b>Taxonomy</b> | <p><i>Which definition best describes a species?</i></p> <p>a. A group of similar looking organisms that live in the same habitat</p> <p>b. A group of organisms that breed together</p> <p>c. A group of organisms that consists of males and females</p> <p>*d. A group of organisms that produce fertile offspring</p> <p>e. None of the above</p> |
|                 | <p><i>In taxonomy, which taxonomic rank is most inclusive?</i></p> <p>a. Species</p> <p>*b. Domain</p> <p>c. Family</p> <p>d. Order</p> <p>e. None of the above</p>                                                                                                                                                                                   |
|                 | <p><i>In taxonomy, which taxonomic rank is more specific than family?</i></p> <p>a. Class</p> <p>*b. Genus</p> <p>c. Order</p>                                                                                                                                                                                                                        |

|                |                                                                                                                                                                                                                    |
|----------------|--------------------------------------------------------------------------------------------------------------------------------------------------------------------------------------------------------------------|
|                | <p>d. Domain</p> <p>e. None of the above</p>                                                                                                                                                                       |
|                | <p><i>In taxonomy, which taxonomic rank is more inclusive than order?</i></p> <p>a. Family</p> <p>b. Genus</p> <p>*c. Phylum</p> <p>d. Species</p> <p>e. None of the above</p>                                     |
|                | <p><i>Organisms in the same genus would _____.</i></p> <p>a. be able to breed together</p> <p>b. have similar physical traits</p> <p>c. have similar DNA</p> <p>*d. all of the above</p>                           |
| <b>Methods</b> | <p><i>Which piece of field equipment would best collect organisms that live in the leaf litter?</i></p> <p>a. malaise trap</p> <p>b. sweep net</p> <p>*c. pit trap</p> <p>d. vane trap</p> <p>e. beating sheet</p> |

|  |                                                                                                                                                                                                                                           |
|--|-------------------------------------------------------------------------------------------------------------------------------------------------------------------------------------------------------------------------------------------|
|  |                                                                                                                                                                                                                                           |
|  | <p><i>Which piece of field equipment would best collect the widest range of organisms that move on the ground and fly?</i></p> <p>*a. malaise trap</p> <p>b. sweep net</p> <p>c. pit trap</p> <p>d. vane trap</p> <p>e. beating sheet</p> |
|  | <p><i>Which piece of equipment would best collect organisms that live in tall grasses and/or the tops of bushes?</i></p> <p>a. malaise trap</p> <p>*b. sweep net</p> <p>c. pit trap</p> <p>d. vane trap</p> <p>e. beating sheet</p>       |
|  | <p><i>Which piece of field equipment would best collect organisms that are attracted to colored traps (e.g., blue and yellow)?</i></p> <p>a. malaise trap</p> <p>b. sweep net</p> <p>c. pit trap</p> <p>*d. vane trap</p>                 |

|                       |                                                                                                                                                                                                                                                                                                                                                                                                                                                                                                                                                                                                                                                                                                                                                                                                         |
|-----------------------|---------------------------------------------------------------------------------------------------------------------------------------------------------------------------------------------------------------------------------------------------------------------------------------------------------------------------------------------------------------------------------------------------------------------------------------------------------------------------------------------------------------------------------------------------------------------------------------------------------------------------------------------------------------------------------------------------------------------------------------------------------------------------------------------------------|
|                       | e. none of the above                                                                                                                                                                                                                                                                                                                                                                                                                                                                                                                                                                                                                                                                                                                                                                                    |
|                       | <p><i>Which piece of field equipment is most likely to have a biased collection?</i></p> <p>a. malaise trap</p> <p>b. sweep net</p> <p>c. pit trap</p> <p>*d. vane trap</p> <p>e. none of the above</p>                                                                                                                                                                                                                                                                                                                                                                                                                                                                                                                                                                                                 |
| <b>Classification</b> | <p><i>Use the dichotomous key for the parrots of Costa Rica to answer the following questions.</i></p> <p>Dichotomous Key for the Parrot of Costa Rica</p> <p>1. a. The body is mostly green.....2</p> <p>    b. The body is not mostly green.....7</p> <p>2. a. The wings do not have red patches.....3</p> <p>    b. The wings have red patches.....4</p> <p>3. a. The head is white with some blue.....White-crowned parrot</p> <p>    b. The head is totally blue.....Blue-headed parrot</p> <p>4. a. The head is white with some green.....White-fronted parrot</p> <p>    b. The head has no white feathers.....5</p> <p>5. a. The head has some red feathers.....Red-lored parrot</p> <p>    b. The head has no red feathers.....6</p> <p>6. a. The neck feathers are white.....Mealy parrot</p> |

|  |                                                                                                                                                                                                                                                                                                                   |
|--|-------------------------------------------------------------------------------------------------------------------------------------------------------------------------------------------------------------------------------------------------------------------------------------------------------------------|
|  | <p>b. The neck feathers are yellow.....Yellow-naped parrot</p> <p>7. a. The head is mostly red.....Scarlet macaw</p> <p>b. The head is mostly green with some red and yellow.....Great green macaw</p>                                                                                                            |
|  | <p><i>Identify a bird with mostly green feathers. It has yellow tail feathers, wings with blue, red, and green feathers, a green head, and a white neck.</i></p> <p>a. White-crowned parrot</p> <p>b. Blue-headed parrot</p> <p>c. Red-lored parrot</p> <p>*d. Mealy parrot</p> <p>e. None of the above</p>       |
|  | <p><i>Identify a bird with mostly green feathers. It has green tail feathers, wings with blue and green feathers, and a white and blue head, and a green neck.</i></p> <p>*a. White-crowned parrot</p> <p>b. Blue-headed parrot</p> <p>c. Red-lored parrot</p> <p>d. Mealy parrot</p> <p>e. None of the above</p> |
|  | <p><i>Identify a bird with blue and green feathers. It has red and blue tail feathers, wings with blue and green feathers, a green and red head, and a green neck.</i></p>                                                                                                                                        |

|                     |                                                                                                                                                                                                                                                                                                                  |
|---------------------|------------------------------------------------------------------------------------------------------------------------------------------------------------------------------------------------------------------------------------------------------------------------------------------------------------------|
|                     | <p>a. Yellow-naped parrot</p> <p>b. Great green macaw</p> <p>c. Red-lored parrot</p> <p>d. Mealy parrot</p> <p>*e. None of the above</p>                                                                                                                                                                         |
|                     | <p><i>Identify a bird with mostly green feathers. It has yellow tail feathers, wings with blue, red, and green feathers, a green head, and a yellow neck.</i></p> <p>a. White-crowned parrot</p> <p>b. Blue-headed parrot</p> <p>c. Red-lored parrot</p> <p>d. Mealy parrot</p> <p>*e. None of the above</p>     |
|                     | <p><i>Identify a bird with mostly green feathers. It has green tail feathers, wings with blue, red, and green feathers, a green and red head, and a green neck.</i></p> <p>a. Yellow-naped parrot</p> <p>b. Great green macaw</p> <p>*c. Red-lored parrot</p> <p>d. Mealy parrot</p> <p>e. None of the above</p> |
| <b>Knowledge of</b> | <i>Which order of insects includes the grasshoppers?</i>                                                                                                                                                                                                                                                         |

|                                     |                                                                                                                                                                         |
|-------------------------------------|-------------------------------------------------------------------------------------------------------------------------------------------------------------------------|
| <p><b>insect classification</b></p> | <p>a. Hymenoptera</p> <p>b. Diptera</p> <p>c. Coleoptera</p> <p>*d. Orthoptera</p> <p>e. None of the above</p>                                                          |
|                                     | <p><i>Which order of insects includes the flies?</i></p> <p>a. Hymenoptera</p> <p>*b. Diptera</p> <p>c. Coleoptera</p> <p>d. Orthoptera</p> <p>e. None of the above</p> |
|                                     | <p><i>Which order of insects includes the bees?</i></p> <p>*a. Hymenoptera</p> <p>b. Diptera</p> <p>c. Coleoptera</p> <p>d. Orthoptera</p> <p>e. None of the above</p>  |
|                                     | <p><i>Which order of insects includes the beetles?</i></p> <p>a. Hymenoptera</p> <p>b. Diptera</p>                                                                      |



|                                 |                                                                                                                                                                                                                                                                                                                                                                                               |
|---------------------------------|-----------------------------------------------------------------------------------------------------------------------------------------------------------------------------------------------------------------------------------------------------------------------------------------------------------------------------------------------------------------------------------------------|
|                                 | <p>*c. Coleoptera</p> <p>d. Orthoptera</p> <p>e. None of the above</p>                                                                                                                                                                                                                                                                                                                        |
|                                 | <p><i>Which order of insects includes the butterflies?</i></p> <p>a. Hymenoptera</p> <p>b. Diptera</p> <p>c. Coleoptera</p> <p>d. Orthoptera</p> <p>*e. None of the above</p>                                                                                                                                                                                                                 |
| <b>Field design and methods</b> | <p><i>Given: You have 3 malaise traps. In order to collect the greatest diversity of insects in your study, you should set up your traps_____.</i></p> <p>a. Spread out in the same habitat</p> <p>b. Clustered together in the same habitat</p> <p>*c. Place one trap in 3 different habitats</p> <p>d. Move the 3 traps every other day in the same habitat</p> <p>e. None of the above</p> |
|                                 | <p><i>Given: You have 3 malaise traps. In order to collect the most accurate diversity of insects in a given habitat, you should set up your traps_____.</i></p> <p>*a. Spread out in the same habitat</p> <p>b. Clustered together in the same habitat</p>                                                                                                                                   |

|  |                                                                                                                                                                                                                                                                                                                                                                                                                                                                  |
|--|------------------------------------------------------------------------------------------------------------------------------------------------------------------------------------------------------------------------------------------------------------------------------------------------------------------------------------------------------------------------------------------------------------------------------------------------------------------|
|  | <p>c. Place one trap in 3 different habitats</p> <p>d. Move the 3 traps every other day in the same habitat</p> <p>e. None of the above</p>                                                                                                                                                                                                                                                                                                                      |
|  | <p><i>Given: Sweep-netting. In order to collect the most accurate diversity of insects in a given habitat, you should_____.</i></p> <p>a. Collect insects for a specific time (30 minutes per day)</p> <p>b. Collect insects along a given track (a transect)</p> <p>c. Collect insects along a given track (a transect) for a specific time</p> <p>*d. Collect insects while moving randomly through a plot for a specific time</p> <p>e. None of the above</p> |
|  | <p><i>Which type of trap would be the least favorable for collection of nocturnal insects?</i></p> <p>a. malaise trap</p> <p>b. sweep net</p> <p>c. pit trap</p> <p>*d. vane trap</p> <p>e. none of the above</p>                                                                                                                                                                                                                                                |
|  | <p><i>Which type of trap would be the least biased collection?</i></p> <p>*a. malaise trap</p> <p>b. sweep net</p>                                                                                                                                                                                                                                                                                                                                               |

|  |                                                                    |
|--|--------------------------------------------------------------------|
|  | <p>c. pit trap</p> <p>d. vane trap</p> <p>e. none of the above</p> |
|--|--------------------------------------------------------------------|

Appendix 2. Content knowledge and skills assessment questions for Ecology (BIOL 3500K). Content knowledge and skills were assessed with pre-exposure (beginning of semester) and post-exposure (end of semester) tests. \* indicates correct answer.

| Content area    | Question                                                                                                                                                                                                                                                                                                                                              |
|-----------------|-------------------------------------------------------------------------------------------------------------------------------------------------------------------------------------------------------------------------------------------------------------------------------------------------------------------------------------------------------|
| <b>Taxonomy</b> | <p><i>Which definition best describes a species?</i></p> <p>a. A group of similar looking organisms that live in the same habitat</p> <p>b. A group of organisms that breed together</p> <p>c. A group of organisms that consists of males and females</p> <p>*d. A group of organisms that produce fertile offspring</p> <p>e. None of the above</p> |
|                 | <p><i>In taxonomy, which taxonomic rank is most inclusive?</i></p> <p>a. Species</p> <p>*b. Domain</p> <p>c. Family</p> <p>d. Order</p> <p>e. None of the above</p>                                                                                                                                                                                   |
|                 | <p><i>In taxonomy, which taxonomic rank is more specific than family?</i></p> <p>a. Class</p> <p>*b. Genus</p> <p>c. Order</p>                                                                                                                                                                                                                        |

|                |                                                                                                                                                                                                                                  |
|----------------|----------------------------------------------------------------------------------------------------------------------------------------------------------------------------------------------------------------------------------|
|                | <p>d. Domain</p> <p>e. None of the above</p>                                                                                                                                                                                     |
| <b>Ecology</b> | <p><i>Biodiversity plays an important role in which ecological service?</i></p> <p>a. Aquatic chemistry</p> <p>b. Atmospheric chemistry</p> <p>c. Nutrient recycling</p> <p>*d. All of the above</p> <p>e. None of the above</p> |
|                | <p><i>Arthropods can be placed in which trophic level?</i></p> <p>a. Chemoautotrophs</p> <p>b. Primary producers</p> <p>*c. Secondary consumers</p> <p>d. All of the above</p> <p>e. None of the above</p>                       |
|                | <p><i>All of the following are abiotic factors influencing the abundance and distribution of species <b>except</b>:</i></p> <p>a. Moisture</p> <p>*b. Predation</p> <p>c. Solar radiation</p> <p>d. Soil composition</p>         |

|  |                                                                                                                                                                                                                                                                                                                                                          |
|--|----------------------------------------------------------------------------------------------------------------------------------------------------------------------------------------------------------------------------------------------------------------------------------------------------------------------------------------------------------|
|  | <p>e. Topography</p> <p><i>Which of the following does <b>not</b> play a role in the regulation of populations?</i></p> <p>a. Competition</p> <p>b. Density dependent factors</p> <p>c. Density independent factors</p> <p>d. All of the above</p> <p>*e. None of the above</p>                                                                          |
|  | <p><i>Ecology could best be described as:</i></p> <p>*a. The abundance and distribution of organisms</p> <p>b. The change in allele frequencies in populations</p> <p>c. The physical forces that distribute water resources</p> <p>d. The naming of organisms according to observable features</p> <p>e. The spatial distribution of land and water</p> |
|  | <p><i>Which order of insects includes the flies?</i></p> <p>a. Hymenoptera</p> <p>*b. Diptera</p> <p>c. Coleoptera</p> <p>d. Orthoptera</p> <p>e. None of the above</p>                                                                                                                                                                                  |
|  | <p><i>Which order of insects includes the bees?</i></p>                                                                                                                                                                                                                                                                                                  |

|                    |                                                                                                                                                                                                      |
|--------------------|------------------------------------------------------------------------------------------------------------------------------------------------------------------------------------------------------|
|                    | <p>*a. Hymenoptera</p> <p>b. Diptera</p> <p>c. Coleoptera</p> <p>d. Orthoptera</p> <p>e. None of the above</p>                                                                                       |
| <b>Methodology</b> | <p><i>Biodiversity is measured by:</i></p> <p>a. Population structure</p> <p>b. Species richness</p> <p>c. Species evenness</p> <p>d. a &amp; b</p> <p>*e. b &amp; c</p> <p>f. None of the above</p> |
|                    | <p><i>The bulk of biodiversity in terrestrial habitats is found in which group of organisms?</i></p> <p>*a. Arthropods</p> <p>b. Fungi</p> <p>c. Plants</p> <p>d. Vertebrates</p>                    |
|                    | <p><i>According to the Simpson index of biodiversity <math>D = \sum (n_i/N)^2</math>, <math>n_i =</math></i></p> <p>*a. Number of individuals</p>                                                    |

|  |                                                                                |
|--|--------------------------------------------------------------------------------|
|  | <p>b. Number of a species</p> <p>c. Population size</p> <p>d. Species name</p> |
|--|--------------------------------------------------------------------------------|



Appendix 3. Content knowledge and skills assessment questions for BIOL 3400K (Cell Biology). Content knowledge and skills were assessed with pre-exposure (beginning of semester) and post-exposure (end of semester) lab quizzes.\* indicates correct answer.

**Questions:**

*What does "PCR" stand for?*

- a. Protein Chemical Reaction
- \*b. Polymerase Chain Reaction
- c. Primer Copy Reagent
- d. Prepared Chromosomal Regeneration

*What is the purpose of the PCR procedure?*

- \*a. to amplify a specific region of DNA
- b. to run a gel
- c. to convert DNA to protein
- d. to replicate an organism's entire genome
- e. all of the above

*Which enzyme is used in the PCR procedure?*

- a. ligase
- \*b. Taq DNA polymerase
- c. helicase
- d. DNA polymerase III

e. all of the above

*Which of the following are important components of PCR?*

a. DNA

b. DNA primers

c. dNTPs (deoxyribonucleotides)

d.  $Mg^{2+}$

\*e. all of the above

*Place in order the following steps involved in PCR:*

(1) newly synthesized strands act as templates

(2) temperature lowered; DNA primers and polymerase added

(3) heat separates strands of parent DNA

(4) complementary base pairing between primers and template

(5) DNA nucleotide bases added; newly synthesized stands produced.

The correct order is:

a. 1 - 2 - 3 - 4 - 5 - 2

b. 3 - 5 - 4 - 2 - 3 - 1

\*c. 3 - 2 - 4 - 5 - 1 - 3

d. 2 - 3 - 4 - 5 - 2 - 1

*What is TRUE about primers used in PCR?*

a. A single primer can be used to amplify a region of DNA

- b. They are usually around 100 base pairs long
- c. They are double-stranded
- \*d. The primer sequence is always included within the amplified DNA
- e. none of the above

*What is true about the following primer? 5'-AGCTGTGGCGCTGCGCGCGGTA-3'*

- a. It is a great primer
- \*b. It has a high GC content
- c. It is too short
- d. It has a melting temperature in the correct range
- e. all of the above

*In agarose gel electrophoresis, DNA is \_\_\_\_\_ charged, and hence moves towards the \_\_\_\_\_ electrode. Smaller bands move \_\_\_\_\_ than larger bands.*

- a. positively; positive; faster
- b. positively; negative; slower
- c. negatively; negative; slower
- \*d. negatively; positive; faster

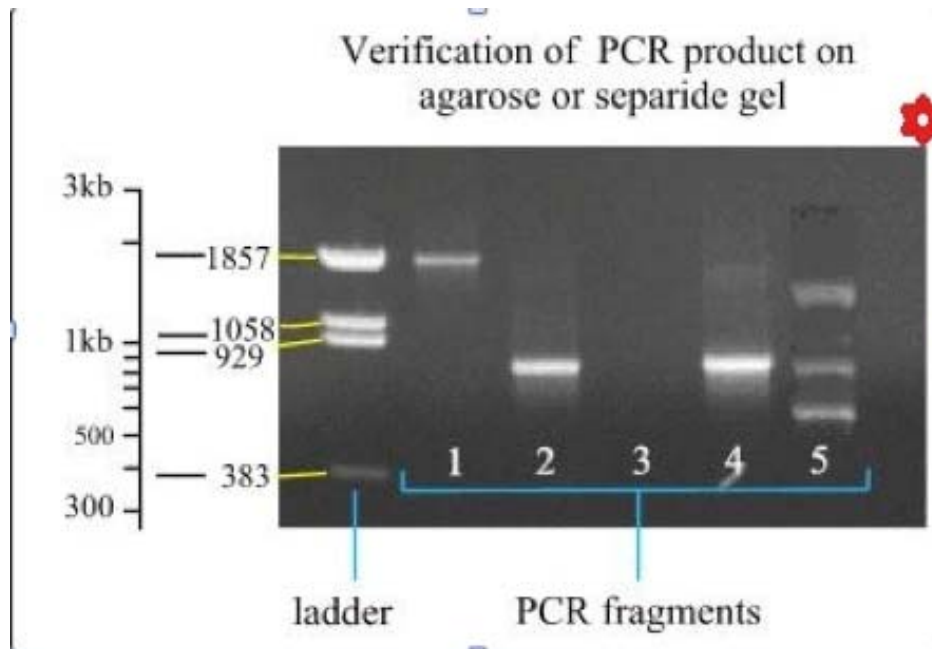

<http://users.ugent.be/~avierstr/principles/pcr.html>

Using the gel picture provided, the RED \* represents the position of the \_\_\_\_\_ electrode.

a. positive

\*b. negative

c. neutral

d. none of the above

Using the gel picture provided, the size of the band in lane 1 is \_\_\_\_\_ bps.

\*a. 1857

b. 902

c. 1593

d. 557

e. 1058

*What are primer dimers?*

a. they have low level intensity

b. primers that are twice as long

c. dissociation product of primer tetramers

\*d. a product forms due to primer complementarity

e. all of the above

*The cytochrome oxidase subunit I (COI) gene is*

a. nuclear

\*b. mitochondrial

c. chloroplastic

d. lysosomal

e. none of the above

*COI gene is involved in*

\*a. cellular respiration

b. transcription

c. fertilization

d. mitosis

e. all of the above

*The purpose of the international DNA barcoding Project is*

- \*a. to obtain a unique identifier of each individual species on Earth
- b. to study migration of monarch butterflies
- c. to study the decrease in the honey-bee population
- d. to study emerging virus

Appendix 4. Survey questions for student attitudes toward science. Attitudes were assessed with pre-exposure (beginning of semester) and post-exposure (end of semester) surveys.

|                                                                                                                                            |
|--------------------------------------------------------------------------------------------------------------------------------------------|
| <i>I understand inquiry and the nature of scientific investigation.</i>                                                                    |
| <i>I have become better at overcoming obstacles and solving problems.</i>                                                                  |
| <i>I can design and carry out my own experiments or projects.</i>                                                                          |
| <i>I understand how to conduct a research project.</i>                                                                                     |
| <i>As a result of my research experience I am more likely to choose a career in a STEM field (Science, Technology, Engineering, Math).</i> |
